# Supplementary material
Source: PubMed Central journal article supplement (PMC9742750)
Supplement: sj-pdf-1-ebm-10.1177_15353702221118091.pdf [file sj-pdf-1-ebm-10.1177_15353702221118091.pdf]

**Supplementary Table 1.** Characteristics and sequencing read data of individual (N=82)

| <b>No.</b> | <b>Samples</b> | <b>Group</b> | <b>Sex</b> | <b>Age</b> | <b>Raw reads</b> | <b>Classified reads</b> | <b>% Classified reads</b> |
|------------|----------------|--------------|------------|------------|------------------|-------------------------|---------------------------|
| 1          | TT-229         | Neg          | Male       | 34         | 6,171            | 5,927                   | 96.0                      |
| 2          | TT-238         | Neg          | Male       | 38         | 7,991            | 7,548                   | 94.5                      |
| 3          | TT-246         | Neg          | Male       | 40         | 4,951            | 4,421                   | 89.3                      |
| 4          | TT-254         | Neg          | Male       | 40         | 5,990            | 5,569                   | 93.0                      |
| 5          | TT-257         | Neg          | Male       | 36         | 5,649            | 4,929                   | 87.3                      |
| 6          | TT-258         | Neg          | Male       | 32         | 7,239            | 7,058                   | 97.5                      |
| 7          | TT-259         | Neg          | Male       | 36         | 3,217            | 3,049                   | 94.8                      |
| 8          | TT-260         | Neg          | Male       | 38         | 6,139            | 5,633                   | 91.8                      |
| 9          | TT-263         | Neg          | Male       | 39         | 5,957            | 5,232                   | 87.8                      |
| 10         | TT-264         | Neg          | Male       | 34         | 5,974            | 5,624                   | 94.1                      |
| 11         | TT-265         | Neg          | Male       | 33         | 7,617            | 7,108                   | 93.3                      |
| 12         | TT-268         | Neg          | Male       | 40         | 6,054            | 5,605                   | 92.6                      |
| 13         | TT-274         | Neg          | Male       | 38         | 5,944            | 5,713                   | 96.1                      |
| 14         | TT-277         | Neg          | Male       | 32         | 5,214            | 4,933                   | 94.6                      |
| 15         | TT-284         | Neg          | Male       | 40         | 5,468            | 5,271                   | 96.4                      |
| 16         | TT-295         | Neg          | Female     | 37         | 7,255            | 6,847                   | 94.4                      |
| 17         | TT-307         | Neg          | Female     | 38         | 5,961            | 5,583                   | 93.7                      |
| 18         | TT-310         | Neg          | Male       | 38         | 6,292            | 6,125                   | 97.3                      |
| 19         | TT-323         | Neg          | Female     | 36         | 6,120            | 6,010                   | 98.2                      |
| 20         | TT-334         | Neg          | Female     | 39         | 5,278            | 5,083                   | 96.3                      |
| 21         | TT-340         | Neg          | Male       | 32         | 15,164           | 14,103                  | 93.0                      |
| 22         | TT-354         | Neg          | Male       | 36         | 6,208            | 5,697                   | 91.8                      |
| 23         | TT-356         | Neg          | Male       | 32         | 8,715            | 8,467                   | 97.2                      |
| 24         | TT-362         | Neg          | Male       | 36         | 9,496            | 8,709                   | 91.7                      |
| 25         | TT-371         | Neg          | Female     | 35         | 17,925           | 16,368                  | 91.3                      |
| 26         | TT-372         | Neg          | Male       | 35         | 23,221           | 21,298                  | 91.7                      |
| 27         | TT-374         | Neg          | Male       | 36         | 11,556           | 11,023                  | 95.4                      |
| 28         | TT-377         | Neg          | Male       | 33         | 23,507           | 21,746                  | 92.5                      |
| 29         | TT-379         | Neg          | Female     | 36         | 27,000           | 25,452                  | 94.3                      |
| 30         | TT-389         | Neg          | Male       | 39         | 2,697            | 2,351                   | 87.2                      |
| 31         | TT-396         | Neg          | Female     | 35         | 19,475           | 18,968                  | 97.4                      |
| 32         | TT-401         | Neg          | Male       | 40         | 17,164           | 16,845                  | 98.1                      |
| 33         | TT-402         | Neg          | Male       | 39         | 13,711           | 13,078                  | 95.4                      |
| 34         | TT-405         | Neg          | Male       | 33         | 14,506           | 13,000                  | 89.6                      |
| 35         | TT-411         | Neg          | Male       | 33         | 18,040           | 16,906                  | 93.7                      |
| 36         | TT-412         | Neg          | Female     | 40         | 9,966            | 8,800                   | 88.3                      |
| 37         | TT-416         | Neg          | Male       | 40         | 15,614           | 14,220                  | 91.1                      |
| 38         | TT-418         | Neg          | Male       | 34         | 12,371           | 11,442                  | 92.5                      |
| 39         | TT-420         | Neg          | Male       | 34         | 15,439           | 14,092                  | 91.3                      |
| 40         | TT-424         | Neg          | Male       | 34         | 24,520           | 22,954                  | 93.6                      |
| 41         | TT-441         | Neg          | Female     | 39         | 11,680           | 10,968                  | 93.9                      |
| 42         | TT-462         | Neg          | Male       | 36         | 15,552           | 14,654                  | 94.2                      |
| 43         | TT-491         | Neg          | Female     | 34         | 19,515           | 18,523                  | 94.9                      |

**Supplementary Table 1. (continued)**

| <b>No.</b>     | <b>Samples</b> | <b>Group</b> | <b>Sex</b> | <b>Age</b> | <b>Raw reads</b> | <b>Classified reads</b> | <b>% Classified reads</b> |
|----------------|----------------|--------------|------------|------------|------------------|-------------------------|---------------------------|
| 44             | C034           | Pos          | Female     | N.A.       | 5,046            | 4,815                   | 95.4                      |
| 45             | C040           | Pos          | Male       | 35         | 5,722            | 5,290                   | 92.5                      |
| 46             | C047           | Pos          | Male       | 47         | 6,072            | 5,848                   | 96.3                      |
| 47             | C062           | Pos          | Female     | 27         | 5,833            | 5,688                   | 97.5                      |
| 48             | C072           | Pos          | Female     | 26         | 2,486            | 2,325                   | 93.5                      |
| 49             | C089           | Pos          | Male       | 45         | 5,856            | 5,580                   | 95.3                      |
| 50             | C099           | Pos          | Male       | 34         | 5,646            | 5,396                   | 95.6                      |
| 51             | C105           | Pos          | Male       | 19         | 6,067            | 5,673                   | 93.5                      |
| 52             | C113           | Pos          | Female     | 22         | 19,890           | 18,934                  | 95.2                      |
| 53             | C119           | Pos          | Female     | 29         | 5,318            | 5,122                   | 96.3                      |
| 54             | Q069           | Pos          | Male       | 23         | 5,896            | 5,682                   | 96.4                      |
| 55             | Q082           | Pos          | Female     | 33         | 5,357            | 5,124                   | 95.7                      |
| 56             | Q088           | Pos          | Male       | 50         | 4,817            | 4,740                   | 98.4                      |
| 57             | Q101           | Pos          | Female     | 58         | 5,942            | 5,653                   | 95.1                      |
| 58             | Q107           | Pos          | Male       | 32         | 6,442            | 6,086                   | 94.5                      |
| 59             | Q108           | Pos          | Female     | 50         | 5,943            | 5,597                   | 94.2                      |
| 60             | TT-210         | Pos          | Male       | 25         | 6,575            | 5,971                   | 90.8                      |
| 61             | TT-225         | Pos          | Male       | N.A.       | 5,829            | 5,644                   | 96.8                      |
| 62             | TT-232         | Pos          | Female     | 24         | 5,660            | 5,397                   | 95.4                      |
| 63             | TT-271         | Pos          | Male       | 36         | 6,105            | 5,477                   | 89.7                      |
| 64             | TT-324         | Pos          | Male       | 59         | 26,097           | 24,735                  | 94.8                      |
| 65             | TT-333         | Pos          | Male       | 11         | 10,592           | 10,194                  | 96.2                      |
| 66             | TT-499         | Pos          | Female     | 26         | 14,454           | 13,835                  | 95.7                      |
| 67             | TT-548         | Pos          | Female     | 25         | 15,307           | 14,060                  | 91.9                      |
| 68             | TT-607         | Pos          | Female     | 37         | 9,487            | 8,563                   | 90.3                      |
| 69             | TT-653         | Pos          | Male       | 22         | 11,322           | 9,908                   | 87.5                      |
| 70             | TT-675         | Pos          | Female     | 26         | 12,604           | 11,734                  | 93.1                      |
| 71             | TT-706         | Pos          | Male       | 29         | 12,117           | 11,542                  | 95.3                      |
| 72             | TT-794         | Pos          | Male       | 23         | 474              | 432                     | 91.1                      |
| 73             | TT-799         | Pos          | Male       | 40         | 14,718           | 13,055                  | 88.7                      |
| 74             | TT-802         | Pos          | Male       | 42         | 14,938           | 13,673                  | 91.5                      |
| 75             | TT-844         | Pos          | Male       | 57         | 17,529           | 16,627                  | 94.9                      |
| 76             | TT-940         | Pos          | Female     | 37         | 9,215            | 8,828                   | 95.8                      |
| 77             | TT-979         | Pos          | Male       | 28         | 14,588           | 13,781                  | 94.5                      |
| 78             | TT-1032        | Pos          | Male       | 29         | 11,608           | 10,721                  | 92.4                      |
| 79             | TT-1096        | Pos          | Female     | 47         | 13,229           | 11,769                  | 89.0                      |
| 80             | TT-1218        | Pos          | Male       | 26         | 16,027           | 14,853                  | 92.7                      |
| 81             | TT-1258        | Pos          | Female     | 46         | 16,535           | 15,081                  | 91.2                      |
| 82             | TT-1270        | Pos          | Male       | 58         | 13,032           | 11,477                  | 88.1                      |
| <b>Average</b> |                |              |            |            | <b>9,760</b>     | <b>9,161</b>            | <b>93.9</b>               |

Neg is negative group. Pos is asymptomatic COVID-19 positive group. N.A. is not available data.

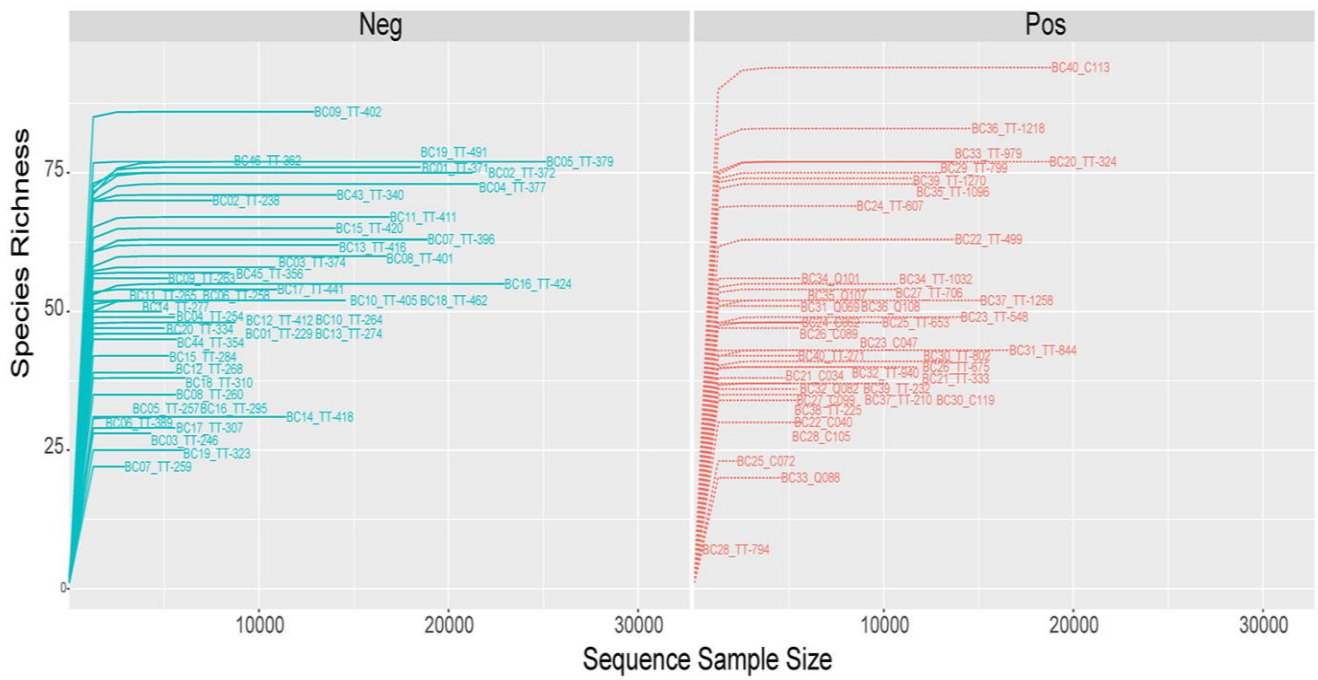

**Supplementary Figure 1.** Rarefaction curves of all the samples in both groups, including asymptomatic COVID-19 positive (pink) and negative (blue) groups.
